# Supplementary material
Source: Springer Nature journal article supplement (https://www.springermedizin.de/resource/supplementary/12958_2012_997_MOESM5_ESM.pdf/9566582)

# Changes in *gnrh* mRNAs in the brain

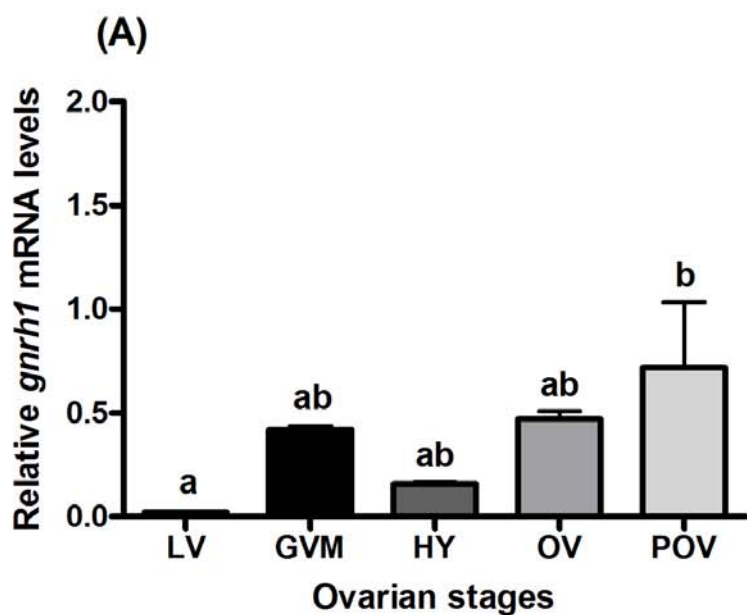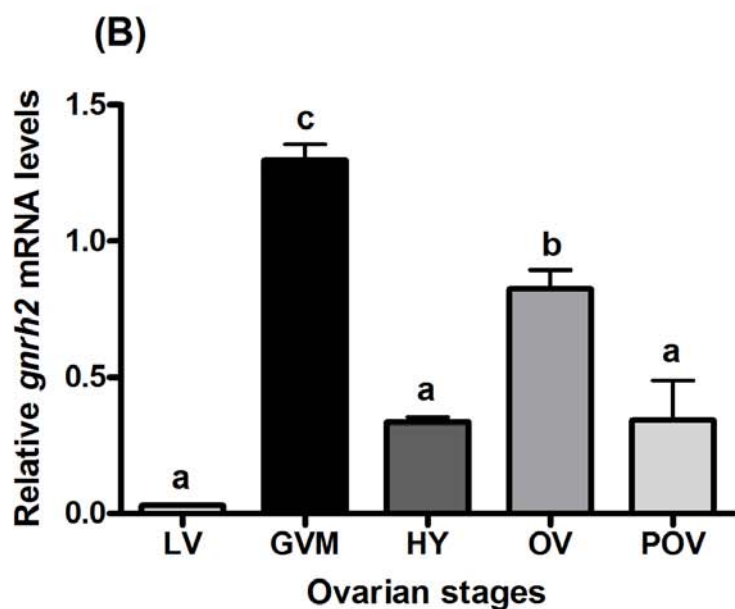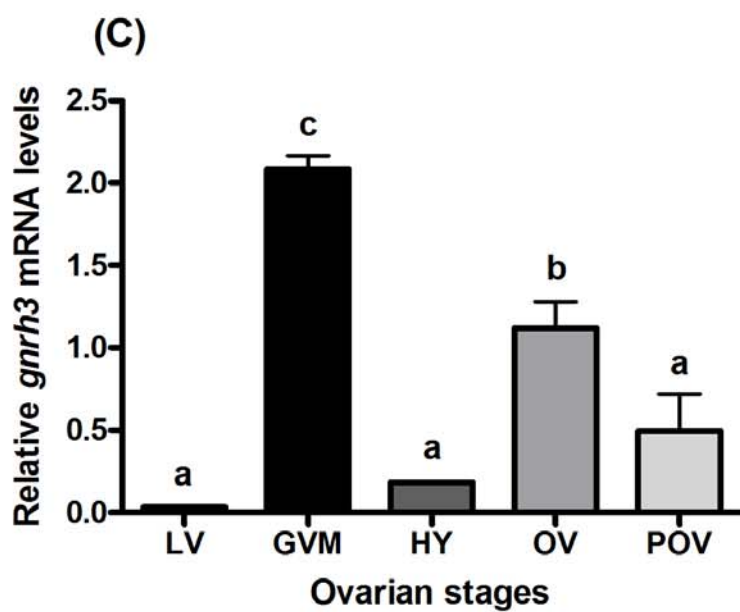

Supplement: MOESM5 [file 9566582]
